# Supplementary material for: Carbon capture, photosynthesis, and leaf gas exchange of shade tree species and Arabica coffee varieties in coffee agroforestry systems in Veracruz state, Mexico
Source: PeerJ journal article supplement (doi:10.7717/peerj.20255), 2025-11-21
Supplement: Supplemental_Table_S1.docx [file Supplemental_Table_S1.docx]

| **Parameter** | **Tree species** | | | | | | |
| --- | --- | --- | --- | --- | --- | --- | --- |
| ***Persea schiedeana (Ps)*** | ***Erythrina Americana (Ea)*** | ***Inga inicuil (Ii)*** | ***Heliocarpus appendiculatus (Ha)*** | ***Psidium guajava (Pg)*** | ***Inga vera (Iv)*** | ***Inga punctata (Ip)*** |
| Fv/Fm (dimensionless) | 0.80 ± 0.06 | 0.74 ± 0.06 | 0.78 ± 0.01 | 0.81 ± 0.05 | 0.81 ± 0.07 | 0.76 ± 0.05 | 0.80 ± 0.06 |
| CO2 assimilation rate (µmol CO2 m2/s) | 2.45 ± 0.40 | 8.37 ± 0.90 | 1.67 ± 0.38 | 7.99 ± 1.16 | 9.18 ± 1.00 | 2.21 ± 1.19 | 5.02 ± 1.34 |
| Transpiration (mmol H2O m2/s) | 0.48 ± 0.10 | 0.71 ± 0.19 | 1.97± 0.35 | 2.34 ± 0.33 | 2.59 ± 0.22 | 1.70 ± 0.47 | 1.15 ± 0.29 |
| Stomatal conductance (mmol H2O m2/s) | 26.57 ± 12.98 | 153.40 ± 46.98 | 151.66 ± 65.46 | 224.88 ± 35.51 | 266.88 ± 29.01 | 245.44 ± 85.25 | 143.75 ± 75.08 |
| Intercellular CO2 (µmol CO2/mol) | 412.56 ± 24.34 | 325.78 ± 21.76 | 419.78 ± 41.88 | 427.44 ± 12.97 | 359.33 ± 10.54 | 444 ± 17.34 | 402.56 ± 20.18 |
| WUE1 (µmol CO2/mmol H2O) | 5.74 ± 2.74 | 16.92 ± 11.05 | 0.83 ± 0.15 | 3.63 ± 0.79 | 3.83 ± 1.91 | 1.86 ± 1.46 | 10.22 ± 14.46 |
| PAR2 understory (μmol m2/s ) | 23.33 ± 4.06 | 92.22 ± 6.66 | 40.00 ± 5.95 | 45.67 ± 10.99 | 59.11 ± 9.20 | 54.00 ± 14.56 | 27.56 ± 3.34 |

1 Instantaneous leaf water-use efficiency

2 Photosynthetically active radiation
