# Supplementary material for: Carbon capture, photosynthesis, and leaf gas exchange of shade tree species and Arabica coffee varieties in coffee agroforestry systems in Veracruz state, Mexico
Source: PeerJ journal article supplement (doi:10.7717/peerj.20255), 2025-11-21
Supplement: Supplemental_Table_S2.docx [file Supplemental_Table_S2.docx]

| **Parameter** | **Shade tree species canopy/Coffee variety** | | | | | | | |
| --- | --- | --- | --- | --- | --- | --- | --- | --- |
| **Unshaded coffee Oro Azteca** | ***Persea schiedeana*-Oro Azteca (*Ps*-Oa)** | ***Erythrin*a *americana*-Tipica (*Ea*-T)** | ***Inga inicuil-*Garnica (*Ii*-G)** | ***Heliocarpus appendiculatus***  **-Oro Azteca (*Ha*-Oa)** | ***Psidium guajava***-**Catuai amarillo (*Pg*-Ca)** | ***Inga vera-*Costa Rica 95 (*Iv*-Cr)** | ***Inga punctata*-Oro Azteca (*Ip*-Oa)** |
| Fv/Fm (dimensionless) | 0.80 ±0.06 | 0.73 ± 0.11 | 0.78 ± 0.02 | 0.75 ± 0.01 | 0.79 ± 0.04 | 0.77 ± 0.01 | 0.79 ± 0.06 | 0.74 ± 0.06 |
| CO2 assimilation rate (µmol CO2 m2/s) | 2.19 ± 0.28 | 3.88 ± 0.74 | 3.79 ± 0.52 | 4.37 ± 1.08 | 5.76 ± 0.91 | 3.57 ± 0.23 | 3.31 ± 0.63 | 5.68 ± 0.65 |
| Transpiration (mmol H2O m2/s) | 0.53 ± 0.04 | 0.23 ± 0.02 | 0.30 ± 0.05 | 1.02 ± 0.25 | 0.30 ± 0.18 | 0.27 ± 0.06 | 0.64 ± 0.28 | 0.53 ± 0.30 |
| Stomatal conductance (mmol H2O m2/s) | 34.05 ± 16.72 | 14.74 ± 1.35 | 26.08 ± 9.96 | 100.17 ± 34.05 | 15.60 ± 4.06 | 37.76 ± 24.04 | 145.70 ± 67.86 | 31.65 ± 11.74 |
| Intercellular CO2 (µmol CO2/mol) | 304.44 ± 38.18 | 223.44 ± 46.47 | 284.88 ± 34.46 | 410.55 ± 26.82 | 305.66 ± 82.79 | 284.88 ± 34.46 | 443.33 ± 162.69 | 448.77± 82.59 |
| WUE1 (µmol CO2/mmol H2O) | 4.61 ± 1.95 | 16. 89± 5.29 | 14.28 ± 10.06 | 7.55± 6.37 | 21.62 ±11.27 | 13.92 ± 2.45 | 7.12 ± 3.78 | 13.71 ± 7.64 |
| PAR2 understory (μmol m2/s ) | 1427 ± 123.98 | 8.44 ± 1.07 | 16.44 ± 2.59 | 20.22 ± 4.16 | 14.77 ± 6.64 | 32.22 ± 5.38 | 47.11 ± 9.18 | 25.11 ± 6.11 |

1 Instantaneous leaf water-use efficiency

2 Photosynthetically active radiation
