# Supplementary material for: Carbon capture, photosynthesis, and leaf gas exchange of shade tree species and Arabica coffee varieties in coffee agroforestry systems in Veracruz state, Mexico
Source: PeerJ journal article supplement (doi:10.7717/peerj.20255), 2025-11-21
Supplement: Supplemental_Table_S3.docx [file Supplemental_Table_S3.docx]

| **PCA for shade tree species** |  |  |  |  |  |
| --- | --- | --- | --- | --- | --- |
| **PC summary** | **PC1** | **PC2** | **PC3** | **PC4** | **PC5** |
| Eigenvalue | 2.178 | 1.671 | 0.9516 | 0.1435 | 0.0552 |
| Proportion of variance | 43.57% | 33.43% | 19.03% | 2.87% | 1.10% |
| Cumulative proportion of variance | 43.57% | 76.99% | 96.03% | 98.90% | 100.00% |
| Component selection | Selected | Selected |  |  |  |

|  | **Loadings** | | **Eigenvectors** | | **Contribution of variables** | | **Var vs PC correlation** | |
| --- | --- | --- | --- | --- | --- | --- | --- | --- |
| **Variable** | **PC1** | **PC2** | **PC1** | **PC2** | **PC1** | **PC2** | **PC1** | **PC2** |
| **Fv/Fm (dimensionless)** | 0.3035197 | -0.491573 | 0.20564609 | -0.3802406 | 0.042290314 | 0.14458292 | 0.3035197 | -0.491573 |
| **CO2 assimilation rate (µmol CO2 m2/s)** | 0.71984521 | 0.59425177 | 0.48772239 | 0.45966446 | 0.237873132 | 0.21129142 | 0.71984521 | 0.59425177 |
| **Stomatal conductance (µmol CO2 mol-1)** | 0.88187311 | -0.107497 | 0.59750243 | -0.0831509 | 0.357009159 | 0.00691407 | 0.88187311 | -0.107497 |
| **Transpiration (mmolH2O m2/s)** | 0.86566093 | -0.4315685 | 0.58651807 | -0.333826 | 0.344003447 | 0.1114398 | 0.86566093 | -0.4315685 |
| **Intercellular CO2 (µmol CO2 mol-1)** | -0.2024985 | -0.937407 | -0.1372004 | -0.7251012 | 0.018823949 | 0.5257718 | -0.2024985 | -0.937407 |

|  | **PC scores** | | **Contribution of cases** | |
| --- | --- | --- | --- | --- |
| **Label** | **PC1** | **PC2** | **PC1** | **PC2** |
| *I. inicuil* | -0.5361664 | -0.914768 | 0.02199455 | 0.08344716 |
| *I. vera* | -0.1736362 | -0.9955505 | 0.00230673 | 0.09883624 |
| *I. punctata* | -0.4549911 | -0.1118918 | 0.01583878 | 0.00124849 |
| *E. americana* | -0.3982908 | 2.72215423 | 0.01213714 | 0.73895006 |
| *P. guajava* | 2.35627485 | 0.3448493 | 0.42478366 | 0.01185901 |
| *H. appendiculatus* | 1.4090035 | -0.7597007 | 0.1518938 | 0.0575539 |
| *P. schiedeana* | -2.2021938 | -0.2850926 | 0.37104533 | 0.00810516 |

| **Correlation matrix** | **Fv/Fm (dimensionless)** | **CO2 assimilation rate (µmol CO2 m2/s)** | **Stomatal conductance (µmol CO2 mol-1)** | **Transpiration (mmolH2O m2/s)** | **Intercellular CO2 (µmol CO2 mol-1)** |
| --- | --- | --- | --- | --- | --- |
| **Fv/Fm (dimensionless)** | 1 | 0.13457802 | -0.0162537 | 0.37966764 | 0.264420625 |
| **CO2 assimilation rate (µmol CO2 m2/s)** | 0.13457802 | 1 | 0.45749697 | 0.30541119 | -0.689212141 |
| **Stomatal conductance (µmol CO2 mol-1)** | -0.0162537 | 0.45749697 | 1 | 0.82473461 | -0.004167353 |
| **Transpiration (mmolH2O m2/s)** | 0.37966764 | 0.30541119 | 0.82473461 | 1 | 0.209002046 |
| **Intercellular CO2 (µmol CO2 mol-1)** | 0.26442063 | -0.6892121 | -0.0041674 | 0.20900205 | 1 |
