# Supplementary material for: Carbon capture, photosynthesis, and leaf gas exchange of shade tree species and Arabica coffee varieties in coffee agroforestry systems in Veracruz state, Mexico
Source: PeerJ journal article supplement (doi:10.7717/peerj.20255), 2025-11-21
Supplement: Supplemental_Table_S4.docx [file Supplemental_Table_S4.docx]

| **PCA for coffee varieties** |  |  |  |  |  |
| --- | --- | --- | --- | --- | --- |
| **PC summary** | **PC1** | **PC2** | **PC3** | **PC4** | **PC5** |
| Eigenvalue | 2.452 | 1.499 | 0.6613 | 0.2592 | 0.1281 |
| Proportion of variance | 49.04% | 29.98% | 13.23% | 5.18% | 2.56% |
| Cumulative proportion of variance | 49.04% | 79.03% | 92.25% | 97.44% | 100.00% |
| Component selection | Selected | Selected |  |  |  |

|  | **Loadings** | | **Eigenvectors** | | **Contribution of variables** | | **Var vs PC correlation** | |
| --- | --- | --- | --- | --- | --- | --- | --- | --- |
| **Variable** | **PC1** | **PC2** | **PC1** | **PC2** | **PC1** | **PC2** | **PC1** | **PC2** |
| **Fv/Fm (dimensionless)** | -0.2039637 | 0.7655636 | -0.1302516 | 0.62524238 | 0.01696547 | 0.39092803 | -0.2039637 | 0.7655636 |
| **CO2 assimilation rate (µmol CO2 m2/s)** | 0.06740206 | -0.8837188 | 0.04304307 | -0.7217407 | 0.00185271 | 0.52090971 | 0.06740206 | -0.8837188 |
| **Stomatal conductance (µmol CO2 mol-1)** | -0.9063147 | 0.16516684 | -0.5787741 | 0.13489317 | 0.3349794 | 0.01819617 | -0.9063147 | 0.16516684 |
| **Transpiration (mmolH2O m2/s)** | -0.8965044 | -0.1059076 | -0.5725092 | -0.0864956 | 0.3277668 | 0.00748149 | -0.8965044 | -0.1059076 |
| **Intercellular CO2 (µmol CO2 mol-1)** | -0.883651 | -0.306069 | -0.564301 | -0.2499692 | 0.31843562 | 0.06248461 | -0.883651 | -0.306069 |

|  | **PC scores** | | **Contribution of cases** | |
| --- | --- | --- | --- | --- |
| **Label** | **PC1** | **PC2** | **PC1** | **PC2** |
| Unshaded coffee Coffea arabica var. Oro azteca | 0.06338633 | 2.03050873 | 0.00023407 | 0.39286735 |
| *I. inicuil*-Garnica (*Ii*-G) | -2.1753716 | -0.8143825 | 0.27569505 | 0.06319651 |
| *I. vera*-Costa rica 95 (*Iv*-Cr) | -2.3547921 | 0.87037998 | 0.32304809 | 0.07218617 |
| *I. punctata*-Oro azteca (*Ip*-Oa) | -0.4356957 | -1.9536699 | 0.01105932 | 0.36369606 |
| *E. americana*-Tipica (*Ea*-I) | 0.98711673 | 0.56162655 | 0.05676741 | 0.03005602 |
| *P. guajava*-Catuai amarillo (*Pg*-Ca) | 0.96745553 | 0.43047972 | 0.05452857 | 0.017658 |
| *H. appendiculatus*-Oro azteca (*Ha*-Oa) | 1.00586738 | -0.5467858 | 0.05894453 | 0.02848857 |
| *P. schiedeana*-Oro azteca (*Ps*-Oa) | 1.94203343 | -0.5781568 | 0.21972297 | 0.03185132 |

| **Correlation matrix** | **Fv/Fm (dimensionless)** | **CO2 assimilation rate (µmol CO2 m2/s)** | **Stomatal conductance (µmol CO2 mol-1)** | **Transpiration (mmolH2O m2/s)** | **Intercellular CO2 (µmol CO2 mol-1)** |
| --- | --- | --- | --- | --- | --- |
| **Fv/Fm (dimensionless)** | 1 | -0.4199694 | 0.2048976 | 0.02770781 | 0.06487748 |
| **CO2 assimilation rate (µmol CO2 m2/s)** | -0.4199694 | 1 | -0.2433241 | -0.0357569 | 0.2720166 |
| **Stomatal conductance (µmol CO2 mol-1)** | 0.2048976 | -0.2433241 | 1 | 0.71476955 | 0.6983324 |
| **Transpiration (mmolH2O m2/s)** | 0.02770781 | -0.0357569 | 0.71476955 | 1 | 0.73100723 |
| **Intercellular CO2 (µmol CO2 mol-1)** | 0.06487748 | 0.2720166 | 0.6983324 | 0.73100723 | 1 |
