# Supplementary material for: Carbon capture, photosynthesis, and leaf gas exchange of shade tree species and Arabica coffee varieties in coffee agroforestry systems in Veracruz state, Mexico
Source: PeerJ journal article supplement (doi:10.7717/peerj.20255), 2025-11-21
Supplement: Supplemental_Table_S5.docx [file Supplemental_Table_S5.docx]

| **Parameter** | **Unshaded coffee**  **(Oro Azteca cv)** | **Shaded coffee**  **(Oro Azteca cv)** |
| --- | --- | --- |
| Sample humidity (%) | 53.97** | 55.56** |
| Nitrogen content (%) | 2.54 ± 0.02** | 2.83 ± 0.06** |

1Statistical analysis was performed using a two-tailed unpaired t-test (t(4) = 7.6; *p* < 0.01). The asterisk indicates significant differences between samples.
